# Supplementary material for: Insights into the electronic structure of Fe penta-coordinated complexes. Spectroscopic examination and electrochemical analysis for the oxygen reduction and oxygen evolution reactions
Source: Royal Society of Chemistry journal article supplement (doi:10.1039/d1ta05991b), 2021-01-01
Supplement: d1ta05991b1.pdf [file d1ta05991b1.pdf]

**Insights into the Electronic Structure of Fe Penta-Coordinated Complexes.  
Spectroscopic Examination and Electrochemical Analysis for the Oxygen Reduction  
and Oxygen Evolution Reactions.**

César Zúñiga Loyola<sup>a</sup>, Gabriel Abarca<sup>b</sup>, Soledad Ureta-Zañartu<sup>a</sup>, Carolina Aliaga<sup>a</sup>, Jose Zagal<sup>a</sup>, Moulay Tahar Sougrati<sup>c</sup>, Frédéric Jaouen<sup>c</sup>, Walter Orellana<sup>d</sup>, Federico Tasca<sup>a\*</sup>

<sup>a</sup> Facultad de Química y Biología, Universidad de Santiago de Chile, Santiago, Chile.

<sup>b</sup> Universidad Bernardo O'Higgins, Centro Integrativo de Biología y Química Aplicada, Santiago Chile.

<sup>c</sup> ICGM, Univ. Montpellier, CNRS, ENSCM, Montpellier, France

<sup>d</sup> Departamento de Ciencias Físicas, Universidad Andrés Bello, Sazié 2212, 837-0136 Santiago, Chile.

\*Corresponding author: Federico.tasca@usach.cl

**Table S1.** Mössbauer parameter determined for FePc-Py-CNT and assignment to Fe species

(\*)

| Catalyst               | Signal | $\delta_{\text{Iso}}$<br>(mm/s) | $\Delta E_Q$<br>(mm/s) | FWHM<br>(mm/s)  | Area (%)        | Possible assignment              |
|------------------------|--------|---------------------------------|------------------------|-----------------|-----------------|----------------------------------|
| Doublet D <sub>a</sub> | a      | 0.23<br>(±0.04)                 | 0.39<br>(±0.06)        | 0.28<br>(±0.07) | 0.47<br>(±0.18) | O-Fe(III)Pc-N<br>or N-Fe(II)Pc-N |
| Doublet D <sub>b</sub> | b      | 0.22<br>(±0.03)                 | 1.04<br>(±0.09)        | 0.45<br>(±0.12) | 0.35<br>(±0.11) | O-Fe(III)Pc/C                    |
| Doublet D <sub>c</sub> | c      | 0.39<br>(±0.08)                 | 0.54<br>(±0.23)        | 0.28<br>(±0.07) | 0.18<br>(±0.08) | O-Fe(III)Pc-N<br>or N-Fe(II)Pc-N |

(\*) Errors are given between parentheses.

**Table S2.** Binding energy for FePc-CNT and FePc-Py-CNT before and after treatment with O<sub>2</sub>.

|                                         | Before exposure to O <sub>2</sub> |             | After exposure to O <sub>2</sub> |                     |
|-----------------------------------------|-----------------------------------|-------------|----------------------------------|---------------------|
|                                         | Binding energy (eV)               |             |                                  |                     |
| Compound                                | Binding energy (eV)               | FePc-Py-CNT | Binding energy (eV)              | Binding energy (eV) |
|                                         | FePc-CNT                          |             | FePc-CNT                         | FePc-Py-CNT         |
| <b>Fe<sup>0</sup></b>                   | -                                 | -           | -                                | 707.4               |
| <b>Fe<sup>2+</sup><sub>(oct)</sub></b>  | 708.5                             | 708.7       | 708.7                            | 708.9               |
| <b>Fe<sup>3+</sup><sub>(oct)</sub></b>  | 709.7                             | 709.8       | 710.3                            | 710.2               |
| <b>Fe<sup>3+</sup><sub>(td)</sub></b>   | 712.0                             | 711.7       | 713.6                            | 711.9               |
| <b>Fe<sup>2+</sup><sub>(sat)</sub></b>  | 714.9                             | 714.1       | 715.2                            | 714.1               |
| <b>Fe<sup>3+</sup><sub>(sat)</sub></b>  | 718.5                             | 718.7       | 718.2                            | 718.8               |
| <b>Fe<sup>2+</sup>/ Fe<sup>3+</sup></b> | 0.42                              | 0.33        | 0.52                             | 0.57                |

**Table S3.** XPS experimental parameter for FePc-CNT before and after exposure to O<sub>2</sub>.

| Compound                          | Before treatment with O <sub>2</sub> |            | After treatment with O <sub>2</sub> |            |
|-----------------------------------|--------------------------------------|------------|-------------------------------------|------------|
|                                   | FWHM*                                | Atomic (%) | FWHM                                | Atomic (%) |
|                                   | FePc-CNT                             | FePc-CNT   | FePc-CNT                            | FePc-CNT   |
| Fe <sup>0</sup>                   | -                                    | -          | -                                   | -          |
| Fe <sup>2+</sup> <sub>(oct)</sub> | 1.7                                  | 23.34      | 1.5                                 | 23.25      |
| Fe <sup>3+</sup> <sub>(oct)</sub> | 2.8                                  | 47.19      | 2.1                                 | 36.77      |
| Fe <sup>3+</sup> <sub>(td)</sub>  | 2.8                                  | 17.14      | 2.2                                 | 19.67      |
| Fe <sup>2+</sup> <sub>(sat)</sub> | 2.7                                  | 6.06       | 3.1                                 | 11.39      |
| Fe <sup>3+</sup> <sub>(sat)</sub> | 2.7                                  | 6.26       | 3.5                                 | 8.93       |

\*FWHM is the full width at half maximum.

**Table S4.** XPS experimental parameter for FePc-Py-CNT before and after exposure to O<sub>2</sub>.

| Compound                          | Before treatment with O <sub>2</sub> |                               | After treatment with O <sub>2</sub> |                               |
|-----------------------------------|--------------------------------------|-------------------------------|-------------------------------------|-------------------------------|
|                                   | FWHM<br>FePc-Py-<br>CNT              | Atomic (%)<br>FePc-Py-<br>CNT | FWHM<br>FePc-Py-<br>CNT             | Atomic (%)<br>FePc-Py-<br>CNT |
| Fe <sup>0</sup>                   | -                                    | -                             | 1.6                                 | 2.18                          |
| Fe <sup>2+</sup> <sub>(oct)</sub> | 1.7                                  | 18.87                         | 1.6                                 | 18.87                         |
| Fe <sup>3+</sup> <sub>(oct)</sub> | 1.7                                  | 40.55                         | 1.8                                 | 36.55                         |
| Fe <sup>3+</sup> <sub>(td)</sub>  | 1.9                                  | 23.14                         | 1.9                                 | 19.14                         |
| Fe <sup>2+</sup> <sub>(sat)</sub> | 2.8                                  | 6.44                          | 3.2                                 | 15.25                         |
| Fe <sup>3+</sup> <sub>(sat)</sub> | 3.4                                  | 10.99                         | 3.5                                 | 8.01                          |

*\*FWHM is the full width at half maximum.*

**Table S5.** Bifunctional performance for various bifunctional electrocatalyst for ORR and OER.

| Catalyst             | $E_{10}$<br>(V vs. RHE) | $E_{1/2}$ ORR<br>(V vs. RHE) | $\Delta E$<br>(V vs. RHE) | Tafel slope (V dec <sup>-1</sup> ) |       | References |
|----------------------|-------------------------|------------------------------|---------------------------|------------------------------------|-------|------------|
|                      |                         |                              |                           | ORR                                | OER   |            |
|                      |                         |                              |                           |                                    |       |            |
| FePc-Py-CNT          | ~1.615                  | 0.935                        | 0.680                     | -0.022                             | 0.214 | This work  |
| FeCoOOH-NF13D-FeNC   | 1.46                    | 0.855                        | 0.605                     | -0.070                             | 0.054 | 10         |
| Ex-FeN-MC            | 1.480                   | 0.850                        | 0.630                     | -                                  | 0.047 | 11         |
| S, N-Fe/N/CNT        | 1.600                   | 0.850                        | 0.750                     | -                                  | 0.082 | 12         |
| FePc-GO              | 1.650                   | 0.890                        | 0.760                     | -                                  | 0.112 | 13         |
| 1@ZIF-67             | 1.646                   | 0.850                        | 0.796                     | -0.056                             | 0.106 | 14         |
| FeNC                 | 1.550                   | 0.720                        | 0.830                     | -                                  |       | 15         |
| CoPc-GO              | 1.600                   | 0.760                        | 0.840                     | -                                  | 0.083 | 13         |
| Mn/Co-N-C            | 1.660                   | 0.800                        | 0.860                     | -0.077                             | 0.145 | 16         |
| Fe-N <sub>x</sub> -C | 1.830                   | 0.910                        | 0.920                     | -0.069                             | 0.243 | 17         |
| 2/CNT                | 1.710                   | 0.760                        | 0.95                      | -0.043                             | 0.072 | 18         |
| Ir/C 20 wt% (Vulcan) | 1.095                   | 0.660                        | 1.095                     | -0.141                             | 0.105 | 19         |
| RuO <sub>2</sub>     | 1.640                   | 0.540                        | 1.100                     | -                                  | -     | 20         |
| Pt/C 20 wt% (Vulcan) | > 2.000                 | 0.810                        | >1.2                      | -0.085                             | 0.155 | 21         |
| IrO <sub>2</sub>     | 1.700                   | 0.380                        | 1.320                     | -                                  | -     | 20         |
| MWCNT-20@B           | 1.910                   | 0.560                        | 1.350                     | -                                  | -     | 22         |

**Table S6.** EIS parameters for the ORR at CNT/GC, Py-CNT/GC and FePc-Py-CNT/GC electrodes in deaerated and O<sub>2</sub> saturated 0.1 M KOH.

| Electrode      | F <sub>R</sub> | E/V vs. RHE | Deaerated R <sub>u</sub> C <sub>dl</sub> circuit |                                      | O <sub>2</sub> saturated, R <sub>u</sub> (R <sub>F</sub> C <sub>dl</sub> ) circuit |                                    |                                      |
|----------------|----------------|-------------|--------------------------------------------------|--------------------------------------|------------------------------------------------------------------------------------|------------------------------------|--------------------------------------|
|                |                |             | R <sub>u</sub> /Ω cm <sup>2</sup>                | C <sub>dl</sub> /μF cm <sup>-2</sup> | R <sub>u</sub> /Ω cm <sup>2</sup>                                                  | R <sub>F</sub> /kΩ cm <sup>2</sup> | C <sub>dl</sub> /μF cm <sup>-2</sup> |
| CNT/GC         | 6.13           | 0.88        | 129                                              | 62.6                                 | 134                                                                                | 4.82                               | 655                                  |
| Py-CNT/GC      | 1.10           | 0.88        | 133                                              | 100                                  | 136                                                                                | 105                                | 84.0                                 |
| FePc-Py-CNT/GC | 6.13           | 0.88        | 90.5                                             | 737                                  | 98                                                                                 | 15.6                               | 873                                  |
| CNT/GC         | 6.13           | 0.78        | 129                                              | 717                                  | 129                                                                                | Error > 10%                        | 717                                  |
| Py-CNT/GC      | 1.10           | 0.78        | 133                                              | 117                                  | 133                                                                                | Error > 10%                        | 117                                  |
| FePc-Py-CNT/GC | 6.13           | 0.78        | 94.4                                             | 1140                                 | 94.3                                                                               | Error > 10%                        | 1140                                 |

**Table S7.** EIS parameters for FePc-Py-CNT/GC electrode (8.6x10<sup>-8</sup> mol Fe cm<sup>-2</sup>; F<sub>R</sub> = 17.5) according to the[R(RC)] equivalent circuit.

| E / V vs. RHE | R <sub>u</sub> / Ω cm <sup>2</sup> | R <sub>F</sub> / kΩ cm <sup>2</sup> | C <sub>dl</sub> / mF cm <sup>-2</sup> |
|---------------|------------------------------------|-------------------------------------|---------------------------------------|
| 0.78          | 8.59                               | 4.66                                | 5.13                                  |
| 1.18          | 8.8                                | 6.99                                | 2.03                                  |
| 1.38          | 10.9                               | 2.44                                | 2.18                                  |
| 1.43          | 10                                 | 0.594                               | 13.8                                  |

**Table S8.** EIS parameters at 1.38 V vs. RHE for the three kinds of electrodes.

| Electrode      | $F_R$ | $R_u / \Omega \text{ cm}^2$ | $R_F / \text{k}\Omega \text{ cm}^2$ | $C_{dl} / \text{mF cm}^{-2}$ |
|----------------|-------|-----------------------------|-------------------------------------|------------------------------|
| CNT/GC         | 4.58  | 6.79                        | 1.13                                | 8.34                         |
| Py-CNT/GC      | 1.66  | 10.6                        | 8.09                                | 1.66                         |
| FePc-Py-CNT/GC | 6.58  | 5.59                        | 0.64                                | 14                           |

**Table S9.** Equilibrium distance between Fe atom and its first-neighbours' atoms in FePc-CNT. ( $\Delta z(\text{Fe})$ ) is the vertical displacement of the Fe atom respect to the FePc plane once the  $\text{O}_2$  molecule is adsorbed.

| Distance ( $\text{\AA}$ ) | FePc-CNT ( $m=2$ ) | $\text{O}_2$ -FePc-CNT ( $m=0$ ) |
|---------------------------|--------------------|----------------------------------|
| Fe-N1                     | 1.931              | 1.946                            |
| Fe-N2                     | 1.931              | 1.933                            |
| Fe-N3                     | 1.93               | 1.933                            |
| Fe-N4                     | 1.932              | 1.947                            |
| Fe-O                      | -                  | 1.774                            |
| O-O                       | -                  | 1.286                            |
| Fe-C                      | 2.948              | 3.156                            |
| $\Delta z(\text{Fe})$     | 0                  | 0.19                             |

The  $\text{O}_2$  binding energy is calculated to be of -0.809 eV. We note that the O-O bond distance increases 3.6% with respect to gas phase  $\text{O}_2$ .

**Table S10.** Equilibrium distances between Fe atom and their first-neighbours' atoms in FePc-Py-CNT. ( $\Delta z(\text{Fe})$ ) is the vertical displacement of the Fe atom respect to the FePc plane once the  $\text{O}_2$  molecule is adsorbed.



| Distance (Å)    | FePc-Py-CNT (m=2) | O <sub>2</sub> -FePc-Py-CNT (m=1) |
|-----------------|-------------------|-----------------------------------|
| Fe-N1           | 1.936             | 1.959                             |
| Fe-N2           | 1.935             | 1.958                             |
| Fe-N3           | 1.935             | 1.942                             |
| Fe-N4           | 1.936             | 1.943                             |
| Fe-N5           | 1.887             | 2.09                              |
| Fe-O            | -                 | 1.832                             |
| O-O             | -                 | 1.292                             |
| $\Delta z$ (Fe) | -0.17             | 0.01                              |

The O<sub>2</sub> binding energy is calculated to be of -0.758 eV. We note that the O-O bond distance increases 4.1% with respect to gas phase O<sub>2</sub>.

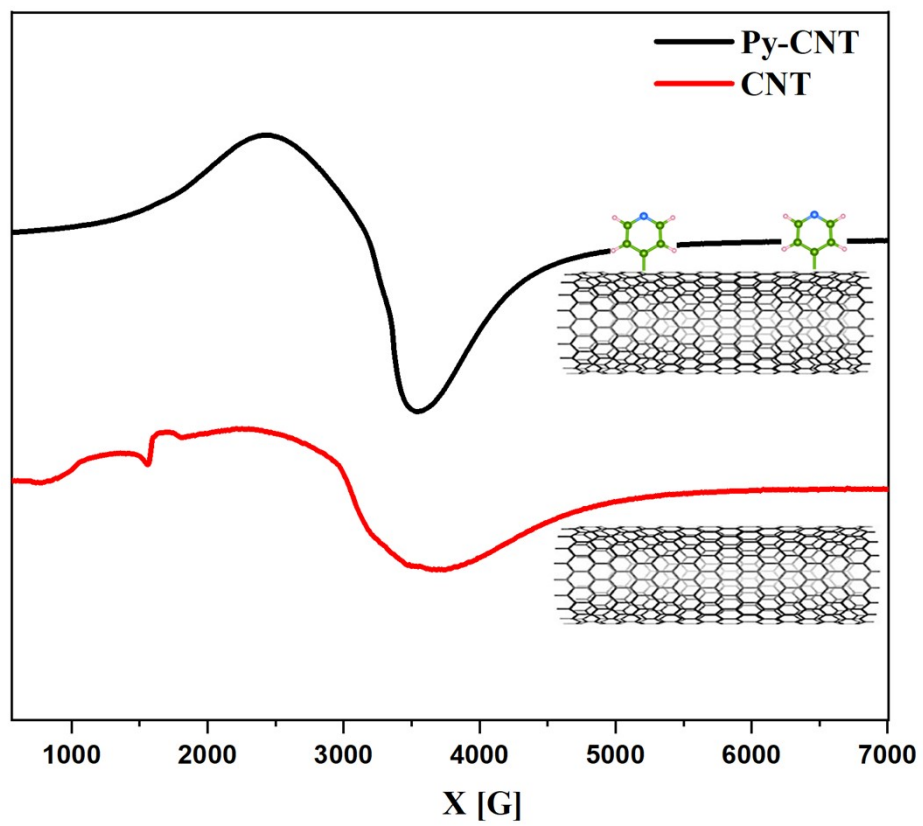

**Figure S1.** EPR spectrum of Py-CNT and CNT.

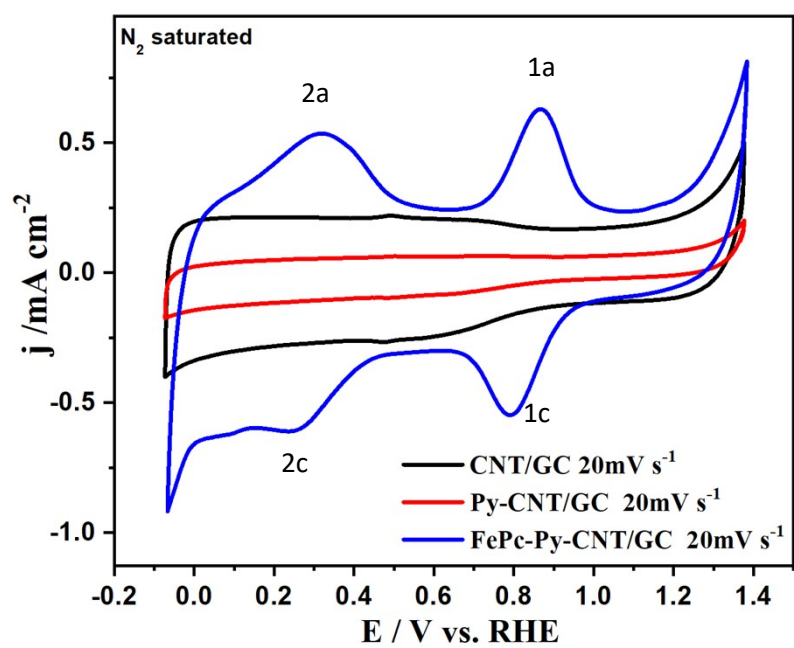

**Figure S2.** Cyclic voltammetry at 20 mV s<sup>-1</sup> in deaerated 0.1 M KOH using CNT/GC, Py-CNT/GC and FePc-Py-CNT/GC electrodes.

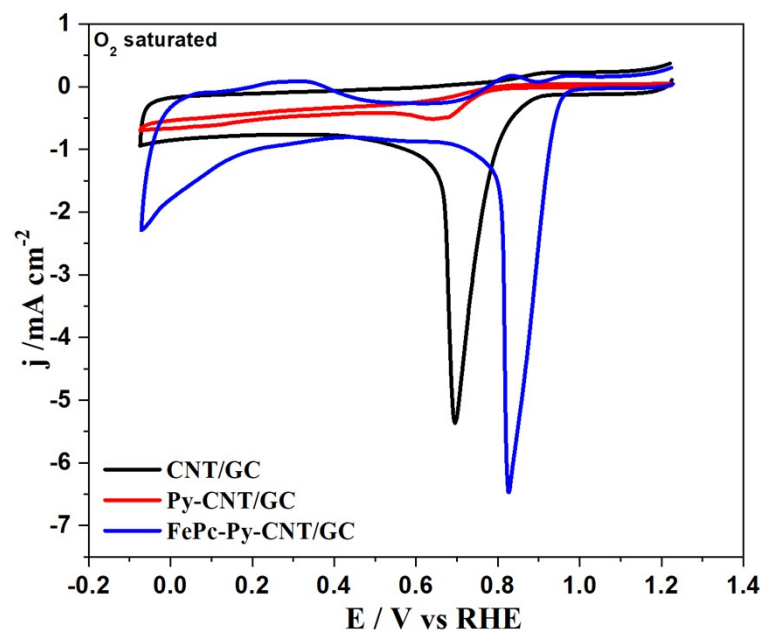

**Figure S3.** Cyclic voltammetry at  $20 \text{ mV s}^{-1}$  in  $\text{O}_2$  saturated  $0.1 \text{ M KOH}$  for CNT/GC, Py-CNT/GC and FePc-Py-CNT/GC electrodes.

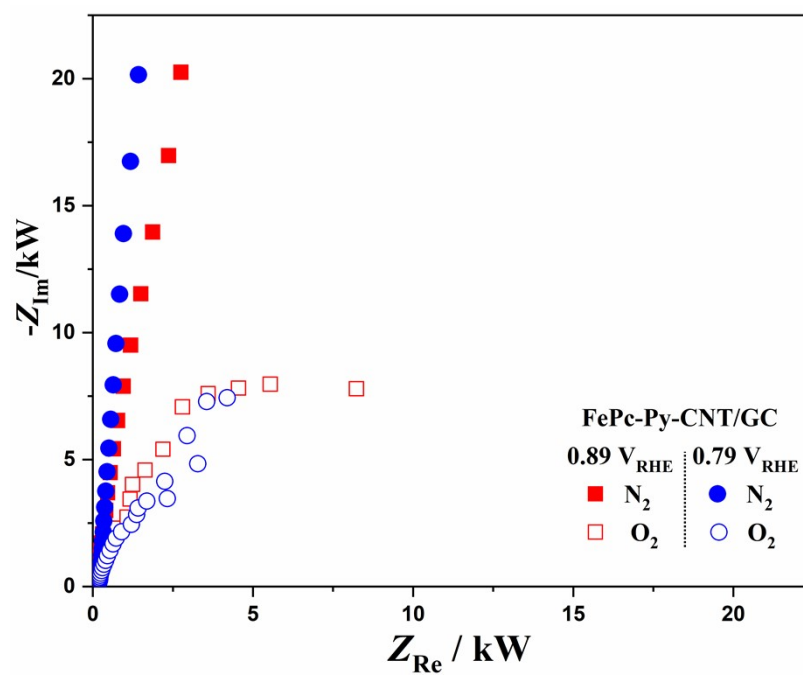

**Figure S4.** Nyquist plots at 0.89 V (squares) and 0.79 V (circles) vs. RHE under deaerated (closed symbols) and O<sub>2</sub> saturated (opened symbols) in 0.1 M KOH solution using FePc-Py-CNT/GC electrode.

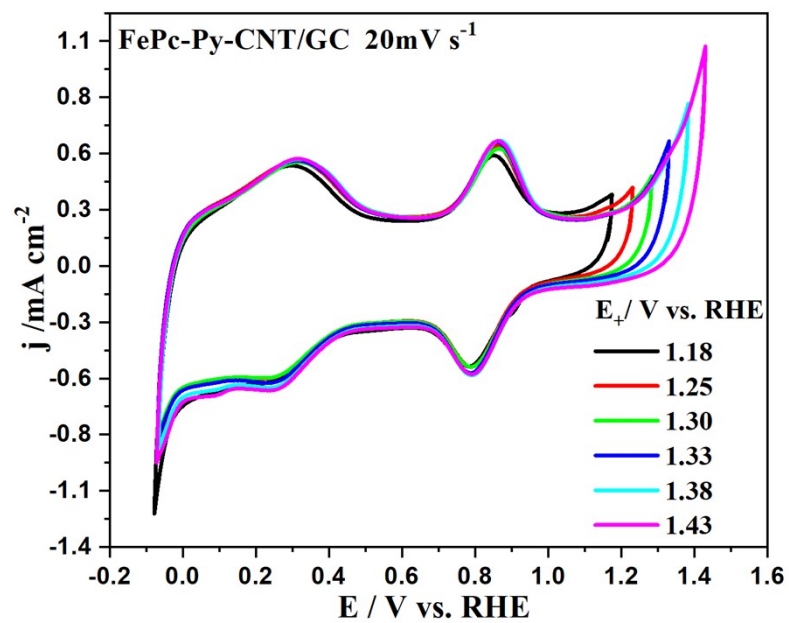

**Figure S5.** Cyclic voltammetry at 20 mV s<sup>-1</sup> in N<sub>2</sub> to different potential ranges for FePc-Py-CNT/GC in 0.1M KOH.

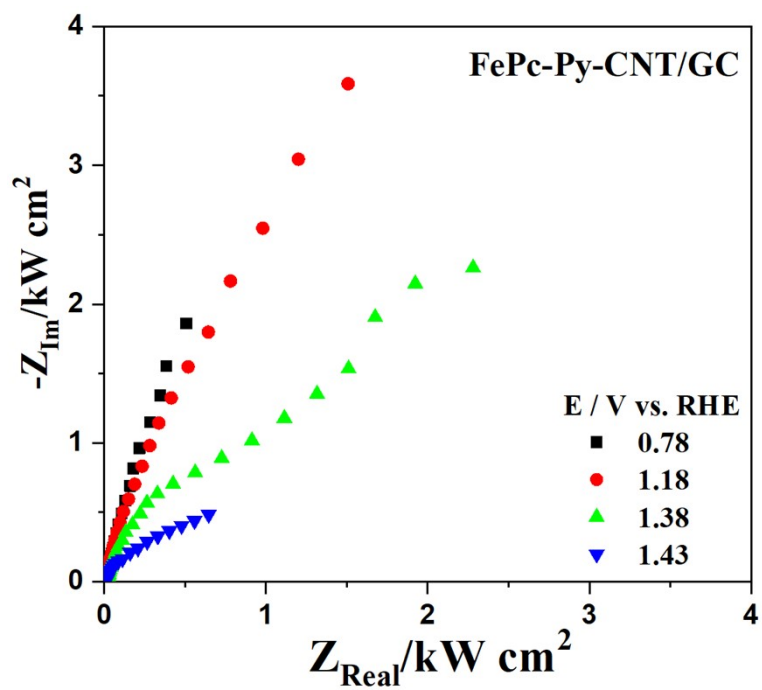

**Figure S6.** Nyquist plots at 0.78, 1.18, 1.38, and 1.43 V vs. RHE in deaerated 0.1M KOH using FePc-Py-CNT/GC electrode.

## References

- 1 C. A. Melendres, *J. Phys. Chem.*, 1980, **84**, 1936–1939.
- 2 U. I. Koslowski, I. Abs-Wurmbach, S. Fiechter and P. Bogdanoff, *J. Phys. Chem. C*, 2008, **112**, 15356–15366.
- 3 U. I. Kramm, M. Lefèvre, N. Larouche, D. Schmeisser and J. P. Dodelet, *J. Am. Chem. Soc.*, 2014, **136**, 978–985.
- 4 D. A. Summerville, I. A. Cohen, K. Hatano and W. R. Scheidt, *Inorg. Chem.*, 1978, **17**, 2906–2910.
- 5 R. Taube, *Pure Appl. Chem.*, 1974, **38**, 427–438.
- 6 L. Ni, C. Gallenkamp, S. Paul, M. Kübler, P. Theis, S. Chabbra, K. Hofmann, E. Bill, A. Schnegg, B. Albert, V. Krewald and U. I. Kramm, *Adv. Energy Sustain. Res.*, 2021, **2**, 2000064.
- 7 G. R. HOY, *Industrial Applications of the Mössbauer Effect*, Springer Netherlands, Norfolk, Virginia, 1st edn., 2002.
- 8 U. I. Kramm, J. Herranz, N. Larouche, T. M. Arruda, M. Lefèvre, F. Jaouen, P. Bogdanoff, S. Fiechter, I. Abs-Wurmbach, S. Mukerjee and J.-P. Dodelet, *Phys. Chem. Chem. Phys.*, 2012, **14**, 11673–11688.
- 9 T. C. G. N.N. Greenwood, in *Methods in molecular biology (Clifton, N.J.)*, 2011, vol. 766, pp. 221–235.
- 10 S. Ibraheem, S. Chen, J. Li, Q. Wang and Z. Wei, *J. Mater. Chem. A*, 2019, **7**, 9497–9502.



- 11 R. Akram, M. A. Ud Din, S. U. Dar, A. Arshad, W. Liu, Z. Wu and D. Wu, *Nanoscale*, 2018, **10**, 5658–5666.
- 12 P. Chen, T. Zhou, L. Xing, K. Xu, Y. Tong, H. Xie, L. Zhang, W. Yan, W. Chu, C. Wu and Y. Xie, *Angew. Chemie - Int. Ed.*, 2017, **56**, 610–614.
- 13 W. Wan, C. A. Triana, J. Lan, J. Li, C. S. Allen, Y. Zhao, M. Iannuzzi and G. R. Patzke, *ACS Nano*, 2020, **14**, 13279–13293.
- 14 Z. Liang, H. Guo, G. Zhou, K. Guo, B. Wang, H. Lei, W. Zhang, H. Zheng, U. P. Apfel and R. Cao, *Angew. Chemie - Int. Ed.*, 2021, 1–6.
- 15 K. Mamtani, D. Jain, A. C. Co and U. S. Ozkan, *Energy and Fuels*, 2017, **31**, 6541–6547.
- 16 L. Wei, L. Qiu, Y. Liu, J. Zhang, D. Yuan and L. Wang, *ACS Sustain. Chem. Eng.*, 2019, **7**, 14180–14188.
- 17 J. Han, X. Meng, L. Lu, J. Bian, Z. Li and C. Sun, *Adv. Funct. Mater.*, 2019, **29**, 1808872.
- 18 H. Qin, Y. Wang, B. Wang, X. Duan, H. Lei, X. Zhang, H. Zheng, W. Zhang and R. Cao, *J. Energy Chem.*, 2021, **53**, 77–81.
- 19 D. Zhou, Z. Cai, X. Lei, W. Tian, Y. Bi, Y. Jia, N. Han, T. Gao, Q. Zhang, Y. Kuang, J. Pan, X. Sun and X. Duan, *Adv. Energy Mater.*, 2018, **8**, 1–7.
- 20 R. A. Rincón, J. Masa, S. Mehrpour, F. Tietz and W. Schuhmann, *Chem. Commun.*, 2014, **50**, 14760–14762.
- 21 X. Xing, R. Liu, K. Cao, U. Kaiser, G. Zhang and C. Streb, *ACS Appl. Mater. Interfaces*, 2018, **10**, 44511–44517.

- 22 Y. Cheng, Y. Tian, X. Fan, J. Liu and C. Yan, *Electrochim. Acta*, 2014, **143**, 291–296.
